# Supplementary material
Source: Springer Nature journal article supplement (https://www.springermedizin.de/resource/supplementary/12879_2009_1211_MOESM1_ESM.pdf/9442106)
Supplement: MOESM1 [file 9442106]

Recruitment

Assessed for eligibility  
n = 3419 (100.0 %)

Exclusion criteria  
n = 319 (9.3 %)

Demographic characteristic: 29 (7.7)  
Chronic disease: 12 (3.2)  
Medication: 8 (2.1)  
FGID<sup>1</sup>: 189 (50.1)  
Refused IC<sup>2</sup>: 81 (21.5)

Questionnaire Q1

Enrolment  
n = 3100 (90.6 %)

Lost to follow up  
n = 293 (9.5 %)

Travel related reason: 93 (31.7)  
no travel: 62 (21.2)  
Non-responders: 138 (47.1)

Diarrhoea duration reported  $\geq$  14days or unresolved prior to enrolment: n = 7 (0.2)

Follow up  
Questionnaire Q2  
and eligible for  
analysis

Follow-up Q2  
n = 2800 (81.9%)

**Participation rate: 90.3 % (Q1/Q2)**
